# Supplementary material
Source: HighWire-hosted journal article supplement (https://jnm.snmjournals.org/highwire/filestream/95116/field_highwire_adjunct_files/0/188698_Supplemental_Data.pdf)
Supplement: 188698_Supplemental_Data.pdf [file 188698_Supplemental_Data.pdf]

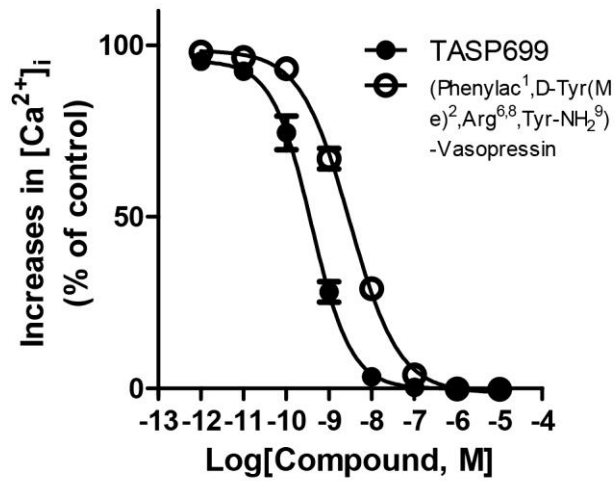

### Supplemental Figure 1

Inhibitions of AVP-induced increases of  $[Ca^{2+}]_i$  as a function of concentrations of TASP699 and [phenylac<sup>1</sup>,D-Tyr(Me)<sup>2</sup>,Arg<sup>6,8</sup>,Tyr-NH<sub>2</sub><sup>9</sup>]-vasopressin as a positive control. Data represent the average percentage of the control response without test compounds from three experiments performed in duplicate. A nonlinear fit was applied to the measured data.

### Supplemental Table 1

Binding of TASP699 to off-target G protein-coupled receptors, transporters, and ion channels

Values are expressed as the means of the percent inhibition of control-specific binding performed in duplicate.

| Target molecule (species)                                 | % inhibition at 1 $\mu$ M |
|-----------------------------------------------------------|---------------------------|
| Adenosine A <sub>1</sub> (human)                          | 2.05                      |
| Adenosine A <sub>2a</sub> (human)                         | 0.00                      |
| Adenosine A <sub>3</sub> (human)                          | 3.67                      |
| Adenosine transporter (guinea pig)                        | 7.03                      |
| $\alpha_{1A}$ -Adrenergic (rat)                           | 0.97                      |
| $\alpha_{1B}$ -Adrenergic (rat)                           | 0.21                      |
| $\alpha_{2A}$ -Adrenergic (human)                         | 6.89                      |
| $\alpha_{2B}$ -Adrenergic (human)                         | 6.00                      |
| $\alpha_{2C}$ -Adrenergic (human)                         | 0.00                      |
| $\beta_1$ -Adrenergic (human)                             | 1.14                      |
| $\beta_2$ -Adrenergic (human)                             | 1.69                      |
| Angiotensin AT <sub>1</sub> (human)                       | 1.51                      |
| Angiotensin AT <sub>2</sub> (human)                       | 4.28                      |
| Androgen (rat)                                            | 1.19                      |
| Bradykinin B <sub>1</sub> (human)                         | 0.00                      |
| Bradykinin B <sub>2</sub> (human)                         | 6.10                      |
| Bombesin (rat)                                            | 0.90                      |
| Ca <sup>2+</sup> channel (type L, benzothiazepine) (rat)  | 5.09                      |
| Ca <sup>2+</sup> channel (type L, dihydropyridine) (rat)  | 1.14                      |
| Ca <sup>2+</sup> channel (type L, phenylalkylamine) (rat) | 1.83                      |
| Ca <sup>2+</sup> channel (type N) (rat)                   | 0.35                      |
| Cannabinoid CB <sub>1</sub> (human)                       | 0.00                      |

---

|                                               |      |
|-----------------------------------------------|------|
| Cannabinoid CB <sub>2</sub> (human)           | 0.00 |
| CCK <sub>A</sub> (human)                      | 1.53 |
| CCK <sub>B</sub> (human)                      | 3.49 |
| CRF <sub>1</sub> (human)                      | 0.00 |
| Dopamine D <sub>1</sub> (human)               | 1.57 |
| Dopamine D <sub>2</sub> short (human)         | 3.49 |
| Dopamine D <sub>3</sub> (human)               | 1.84 |
| Dopamine D <sub>4.2</sub> (human)             | 1.30 |
| Dopamine D <sub>5</sub> (human)               | 0.00 |
| Dopamine transporter (human)                  | 0.46 |
| Estrogen (rat)                                | 0.00 |
| Endothelin ET <sub>A</sub> (human)            | 0.00 |
| Endothelin ET <sub>B</sub> (human)            | 0.00 |
| GABA <sub>A</sub> (agonist Site) (rat)        | 0.00 |
| GABA <sub>A</sub> (benzodiazepine site) (rat) | 0.85 |
| GABA <sub>A</sub> (chloride channel) (rat)    | 3.50 |
| GABA <sub>B</sub> (rat)                       | 7.74 |
| GABA transporter (rat)                        | 0.00 |
| Glucocorticoid (human)                        | 0.06 |
| Glutamate (AMPA) (rat)                        | 0.00 |
| Glutamate (kainate) (rat)                     | 0.00 |
| Glutamate (NMDA agonist site) (rat)           | 0.00 |
| Glutamate (NMDA glycine site) (rat)           | 0.81 |
| Glutamate (NMDA phencyclidine site) (rat)     | 0.70 |
| Glutamate (NMDA polyamine site) (rat)         | 0.00 |
| Glycine (strychnine-sensitive) (rat)          | 0.06 |
| Histamine H <sub>1</sub> (human)              | 0.00 |
| Histamine H <sub>2</sub> (human)              | 3.75 |
| Histamine H <sub>3</sub> (human)              | 9.07 |
| Imidazoline (central) (rat)                   | 3.26 |
| IP <sub>3</sub> (rat)                         | 1.42 |

---

---

|                                               |      |
|-----------------------------------------------|------|
| K <sup>+</sup> channel K <sub>A</sub> (rat)   | 0.00 |
| K <sup>+</sup> channel K <sub>ATP</sub> (rat) | 2.57 |
| K <sup>+</sup> channel SK <sub>Ca</sub> (rat) | 6.24 |
| Leukotriene B <sub>4</sub> (guinea pig)       | 5.27 |
| Leukotriene D <sub>4</sub> (guinea pig)       | 0.00 |
| Melatonin MT <sub>1</sub> (human)             | 0.97 |
| Monoamine transporter (Rabbit)                | 1.47 |
| Muscarinic M <sub>1</sub> (human)             | 0.26 |
| Muscarinic M <sub>2</sub> (human)             | 0.38 |
| Muscarinic M <sub>3</sub> (human)             | 4.83 |
| Muscarinic M <sub>4</sub> (human)             | 1.06 |
| Muscarinic M <sub>5</sub> (human)             | 6.41 |
| Na <sup>+</sup> channel Site 2 (rat)          | 2.14 |
| Neurokinin NK <sub>1</sub> (human)            | 0.18 |
| Neurokinin NK <sub>2</sub> (human)            | 1.30 |
| Neurokinin NK <sub>3</sub> (human)            | 0.41 |
| Neuropeptide Y <sub>1</sub> (human)           | 1.86 |
| Neuropeptide Y <sub>2</sub> (human)           | 1.11 |
| Neurotensin NT <sub>1</sub> (human)           | 0.00 |
| Norepinephrine transporter (human)            | 2.43 |
| Nicotinic (human)                             | 0.29 |
| Opiate δ (human)                              | 3.43 |
| Opiate κ (human)                              | 1.07 |
| Opiate μ (human)                              | 0.00 |
| Opiate ORL <sub>1</sub> (human)               | 5.85 |
| PAF (rabbit)                                  | 8.62 |
| Prostanoid EP <sub>2</sub> (human)            | 0.44 |
| Serotonin 5HT <sub>1A</sub> (human)           | 2.86 |
| Serotonin 5HT <sub>2A</sub> (human)           | 7.38 |
| Serotonin 5HT <sub>3</sub> (human)            | 5.52 |
| Serotonin transporter (human)                 | 3.38 |

---

---

|                               |      |
|-------------------------------|------|
| Sigma $\sigma_1$ (guinea pig) | 3.74 |
| Sigma $\sigma_2$ (guinea pig) | 0.18 |
| VIP <sub>1</sub> (human)      | 0.00 |

---

CCK, cholecystokinin; CRF, corticotropin-releasing factor; GABA, 4-aminobutanoic acid; AMPA, 2-amino-3-(3-hydroxy-5-methyl-isoxazol-4-yl)propanoic acid; NMDA, N-methyl-D-aspartate; IP, inositol phosphate; ORL, opioid receptor-like; PAF, platelet activating factor; VIP, vasoactive intestinal peptide.
